# Supplementary material
Source: MDPI journal article supplement (https://www.mdpi.com/2071-1050/11/12/3436)
Supplement: s1 [file s1]

## Supplementary Materials

### File S1: Questionnaire: Effectiveness of online digital media advertising as a strategic tool for building brand sustainability: Evidence from FMCGs and Services sectors of Pakistan.

#### Annexure—I:

##### Q1: Gender:

1. Male 2. Female

##### Q2: Marital Status:

1. Single 2. Married 3. Divorced

##### Q3: Age:

1. 18–30 years 2. 30–40 years 3. 40–50 years 4. 50–60 years 5. More than 60 years

##### Q4: Education:

1. High School 2. Graduation 3. Post-graduation 4. Professional degree

##### Q5: Experience:

1. 1-5 years 2. 5-10 years 3. 10-15 years 4. 15-20 years 5. More than 20 years

##### Q6: Income: (in PKR, K = thousands)

1. 10-30 K 2. 30-50 K 3. 50-70 K 4. 70-90 K 5. More than 90 K

#### Annexure—II:

Five (5) Likert Scale:

Strongly disagree = 1 Disagree = 2 neither disagree nor agree = 3 Agree = 4 strongly agree = 5

| ODA1   | Q1  | 1                                                                                                                                                          | 2 | 3 | 4 | 5 |
|--------|-----|------------------------------------------------------------------------------------------------------------------------------------------------------------|---|---|---|---|
|        |     | Influence of interactive digital media has a positive impact when I search for information about the product on the Internet                               |   |   |   |   |
| ODA2   | Q2  | Influence of advertising is the key factor when I search for information about the product on the Internet advertisements                                  |   |   |   |   |
| ODA3   | Q3  | I usually make purchases through online stores rather than offline stores                                                                                  |   |   |   |   |
| EM1    | Q4  | 1                                                                                                                                                          | 2 | 3 | 4 | 5 |
|        |     | Influence of Email marketing has a significant impact while I receive the information about the product through Emails advertisements (Promotion category) |   |   |   |   |
| EM2    | Q5  | I usually use email marketing for B2B products, and email is a significant factor for the institutional products and services                              |   |   |   |   |
| EM3    | Q6  | I always check my email for online ads and surfing the websites for both B2B and consumer goods and services                                               |   |   |   |   |
| MPM1   | Q7  | 1                                                                                                                                                          | 2 | 3 | 4 | 5 |
|        |     | Influence of Mobile marketing has a prominent impact when I receive the information about the product through SMS or Mobile Apps advertisements            |   |   |   |   |
| MPM2   | Q8  | Mobile apps are significantly influence my purchases behavior for online buying                                                                            |   |   |   |   |
| MPM3   | Q9  | SMS influence and guide me regarding the sales promotion and I do online purchases                                                                         |   |   |   |   |
| SEOCW1 | Q10 | 1                                                                                                                                                          | 2 | 3 | 4 | 5 |
|        |     | Influences of search engines & company websites have a significant impact while I search for information about the product on the Internet advertisement   |   |   |   |   |
| SEOCW2 | Q11 | I usually prefer to select any search engine while searching better deals for online services and products                                                 |   |   |   |   |
| SEOCW3 | Q12 | Company websites always fascinate me, and I visit company websites while making online purchases                                                           |   |   |   |   |

|      |     |                                                                                                                                                       |   |   |   |   |
|------|-----|-------------------------------------------------------------------------------------------------------------------------------------------------------|---|---|---|---|
| SMM1 |     | 1                                                                                                                                                     | 2 | 3 | 4 | 5 |
|      | Q13 | Influences of Social Networks have a substantial impact when I search for information about the product on the Internet advertisements                |   |   |   |   |
| SMM2 | Q14 | I frequently use social media websites that provides the useful information regarding the promotion and other attributes for online buying            |   |   |   |   |
| SMM3 | Q15 | Social media plays a vital role in reshaping my behavior for online purchases                                                                         |   |   |   |   |
| COA1 |     | 1                                                                                                                                                     | 2 | 3 | 4 | 5 |
|      | Q16 | Overall Characteristics of the advertisement/online fascinate me and I search for information about the product on the Internet                       |   |   |   |   |
| COA2 | Q17 | Characteristics of online advertising always inspired me while I make online purchases                                                                |   |   |   |   |
| COA3 | Q18 | Online advertising, fascinate me content, design, animation and other characteristics while making online purchases                                   |   |   |   |   |
| DSA1 |     | 1                                                                                                                                                     | 2 | 3 | 4 | 5 |
|      | Q19 | Design of a the advertisement/online attracts me while I searching for information about the product on the Internet                                  |   |   |   |   |
| DSA2 | Q20 | Color, animation, and fonts always fascinate me while I go through online advertisement                                                               |   |   |   |   |
| DSA3 | Q21 | Design of online advertising is a motivator factor for me while I make online purchases                                                               |   |   |   |   |
| DUA1 |     | 1                                                                                                                                                     | 2 | 3 | 4 | 5 |
|      | Q22 | Duration of a the advertisement/online appeal me and I search for information about the product on the Internet                                       |   |   |   |   |
| DUA2 | Q23 | The repetition of online advertising always catching and instigate me                                                                                 |   |   |   |   |
| DUA3 | Q24 | The longer the advertising reshape or instigate my purchase behavior                                                                                  |   |   |   |   |
| QCA1 |     | 1                                                                                                                                                     | 2 | 3 | 4 | 5 |
|      | Q25 | Quality Contents of a the advertisement/online inspire me while I searching for information about the product on the Internet                         |   |   |   |   |
| QCA2 | Q26 | The contents, animation of advertising always inspired me while making online purchases                                                               |   |   |   |   |
| QCA3 | Q27 | The information provided on the site is an important factor for online purchases                                                                      |   |   |   |   |
| CA1  |     | 1                                                                                                                                                     | 2 | 3 | 4 | 5 |
|      | Q28 | My attitude guides me while I review the advertisement/online and I search for information about those product which satisfy me on the Internet       |   |   |   |   |
| CA2  | Q29 | I usually prefer my choice that I already my mind accepted                                                                                            |   |   |   |   |
| CA3  | Q30 | I choose products and services online that satisfy my attitude and taste                                                                              |   |   |   |   |
| BLO1 |     | 1                                                                                                                                                     | 2 | 3 | 4 | 5 |
|      | Q31 | Brand loyalty is the key factor while I review the advertisement/online and I search for information about those product on the Internet              |   |   |   |   |
| BLO2 | Q32 | I usually prefer the brand name while I make purchases online                                                                                         |   |   |   |   |
| BLO3 | Q33 | Online digital media strengthen the brand value of products and services                                                                              |   |   |   |   |
| PPE1 |     | 1                                                                                                                                                     | 2 | 3 | 4 | 5 |
|      | Q34 | Previous Purchase experience is a significant factor for the advertisement/online while I search for information about the product on the Internet    |   |   |   |   |
| PPE2 | Q35 | I usually buy online those products and services that satisfy my needs in previous purchases                                                          |   |   |   |   |
| PPE3 | Q36 | Previous purchase experience is the biggest guiding and deciding factor while I go through online advertising                                         |   |   |   |   |
| WOM1 |     | 1                                                                                                                                                     | 2 | 3 | 4 | 5 |
|      | Q37 | Word of Mouth definitely an important factor for the advertisement/online and I search for information about that recommended product on the Internet |   |   |   |   |

|      |     |                                                                                                                                                                                                                    |   |   |   |   |
|------|-----|--------------------------------------------------------------------------------------------------------------------------------------------------------------------------------------------------------------------|---|---|---|---|
| WOM2 | Q38 | Family/friends influences are always play a vital role when I review the advertisement/online and I search for information about the product on the Internet accordingly                                           |   |   |   |   |
| WOM3 | Q39 | My personal/family beliefs always instigate me when I review the advertisement/online and I search for information about the product on the Internet                                                               |   |   |   |   |
| IIT1 | Q40 | 1                                                                                                                                                                                                                  | 2 | 3 | 4 | 5 |
|      |     | Innovation in information technology is the prominent reason, that is why advertisement/online inspire me and I can easily choose and purchase products                                                            |   |   |   |   |
| IIT2 | Q41 | Latest technologies of information boost up the influence of online advertising opportunities                                                                                                                      |   |   |   |   |
| IIT3 | Q42 | Information technologies provide excellent features for online advertising that influence me for online purchases                                                                                                  |   |   |   |   |
| FOI1 | Q43 | 1                                                                                                                                                                                                                  | 2 | 3 | 4 | 5 |
|      |     | Fiber optics makes faster the Internet speed and I feel comfortable and hassle free to get information from the Internet advertisement about products                                                              |   |   |   |   |
| FOI2 | Q44 | The faster internet always give me hassle free opportunities to select a product and service while browsing electronic devices                                                                                     |   |   |   |   |
| FOI3 | Q45 | The fastest internet make me happy and easy to choose products                                                                                                                                                     |   |   |   |   |
| SOP1 | Q46 | 1                                                                                                                                                                                                                  | 2 | 3 | 4 | 5 |
|      |     | Now speeds of our PCs are enormous because of processors, which makes easy to review the multimedia advertisement of products on the Internet                                                                      |   |   |   |   |
| SOP2 | Q47 | The electron devices which have faster speed processors that always instigate my online searches                                                                                                                   |   |   |   |   |
| SOP3 | Q48 | The speed of device always increase my habit of online searches for purchases                                                                                                                                      |   |   |   |   |
| ITT1 | Q49 | 1                                                                                                                                                                                                                  | 2 | 3 | 4 | 5 |
|      |     | Innovation in Telecommunication technology is the obvious reason, that is why advertisements inspire me through SMS & Mobile Apps and I can easily choose and purchase products on the Internet or from the market |   |   |   |   |
| ITT2 | Q50 | Innovation in telecommunication has opened up new horizons for smart devices that influence the online purchase for services and goods                                                                             |   |   |   |   |
| ITT2 | Q51 | Telecommunication technologies provide excellent features for online advertising that influence me for online purchases                                                                                            |   |   |   |   |
| SMP1 | Q52 | 1                                                                                                                                                                                                                  | 2 | 3 | 4 | 5 |
|      |     | Smart phone are revolutionary product, which makes very easy and faster to review the internet advertisement, information from SMS or Emails regarding product and its purchases anytime, anywhere                 |   |   |   |   |
| SMP2 | Q53 | I usually use my smartphone for browsing and searching for online purchases                                                                                                                                        |   |   |   |   |
| SMP3 | Q55 | The Smartphone is the most important element of my life that increase my productivity                                                                                                                              |   |   |   |   |
| GTT1 | Q55 | 1                                                                                                                                                                                                                  | 2 | 3 | 4 | 5 |
|      |     | 3G, 4G & 5G technologies facilitated the internet traffic on smart phones and other gadgets and now it is easy to review the internet, SMS & Email advertisement of products and purchases anytime, anywhere       |   |   |   |   |
| GTT2 | Q56 | Generation technologies provides speed and other unique features to my smartphone that enhances the productivity of mine in every sphere of life                                                                   |   |   |   |   |
| GTT3 | Q57 | G4 technologies speed up the electronic devices that makes me very comfortable                                                                                                                                     |   |   |   |   |

Source: Adapted from previous studies e.g., Ahmed et al. [11], Filipovic [42], and Geçti & Gümüş [43], Çizmecı & Ercan [49] and Blair [88] etc.
